# Supplementary material for: People Diagnosed with Myasthenia Gravis have Lower health-related quality of life and Need More Medical and Caregiver Help in Comparison to the General Population: Analysis of Two Observational Studies
Source: Springer Nature journal article supplement (doi:10.1007/s12325-023-02604-z), 2023-07-25
Supplement: MOESM1 [file 25845282]

# Supplementary Material

## **People diagnosed with Myasthenia Gravis have lower HRQoL and need more medical and caregiver help in comparison to the General Population: analysis of two observational studies**

### **AUTHORS**

Dewilde S, PhD<sup>1</sup>, Phillips G, PhD<sup>2</sup>, Paci S, PhD<sup>3</sup>, De Ruyck F<sup>3</sup>, Tollenaar NH<sup>1</sup>, Janssen MF, PhD<sup>4</sup>

### **AFFILIATIONS**

<sup>1</sup> Services in Health Economics (SHE), Brussels, Belgium

<sup>2</sup> argenx UC Inc., Boston, US

<sup>3</sup> argenx BV, Ghent, Belgium

<sup>4</sup> Section Medical Psychology and Psychotherapy, Department of Psychiatry, Erasmus MC, Rotterdam, The Netherlands

### **CORRESPONDING AUTHOR**

Sarah Dewilde, PhD

Services in Health Economics (SHE) Rue JG

Eggerickx 36, 1150 Brussels, Belgium

[sd@she-consulting.be](mailto:sd@she-consulting.be)

+32 484 064 210

**Table S1 Frequency of co-morbidities in MRW versus POPUP**

| Type of co-morbidity (self-reported)    | POPUP        | MRW          |
|-----------------------------------------|--------------|--------------|
| Thyroid problems                        | 9.5%         | 22.5%        |
| Anxiety                                 | 14.4%        | 16.4%        |
| Depression                              | 11.4%        | 14.5%        |
| Respiratory disease (e.g. asthma, COPD) | 8.7%         | 12.6%        |
| Osteoporosis                            | 3.2%         | 10.1%        |
| Diabetes                                | 10.3%        | 8.0%         |
| Cardiovascular disease                  | 4.5%         | 4.8%         |
| Cancer                                  | 2.0%         | 3.8%         |
| Rheumatoid arthritis                    | 4.7%         | 3.1%         |
| Psoriasis                               | 3.0%         | 2.3%         |
| Psoriatic arthritis                     | 0.8%         | 1.1%         |
| <i>None of the above</i>                | <i>41.0%</i> | <i>32.2%</i> |

Abbreviations: MRW: MyRealWorld-MG dataset, POPUP: General Population Norms Study Dataset, COPD: chronic obstructive pulmonary disease.

**Table S2 Distribution of respondents from MRW vs POPUP across the 8 MG-ADL domains**

|                                                          | <b>MRW</b> | <b>POPUP</b> |
|----------------------------------------------------------|------------|--------------|
| <b>Talking</b>                                           |            |              |
| Normal                                                   | 55.5%      | 94.4%        |
| Intermittent slurry or nasal speech                      | 38.5%      | 3.9%         |
| Constant slurring or nasal, but can be understood        | 3.6%       | 1.1%         |
| Difficult to understand speech                           | 2.4 %      | 0.6 %        |
| <b>Chewing</b>                                           |            |              |
| Normal                                                   | 54.6%      | 93.3%        |
| Fatigue with solid food                                  | 39.8%      | 5.0%         |
| Fatigue with soft food                                   | 4.9%       | 1.4%         |
| Gastric tube                                             | 54.6 %     | 93.3 %       |
| <b>Swallowing</b>                                        |            |              |
| Normal                                                   | 52.1%      | 93.0%        |
| Rare episode of choking                                  | 41.4%      | 5.1%         |
| Frequent choking necessitating changes in diet           | 5.8%       | 1.5%         |
| Gastric tube                                             | 0.7 %      | 0.4 %        |
| <b>Breathing</b>                                         |            |              |
| Normal                                                   | 37.5%      | 76.5%        |
| Shortness of breath with exertion                        | 51.0%      | 19.9%        |
| Shortness of breath at rest                              | 10.7%      | 2.8%         |
| Ventilator dependence                                    | 0.9 %      | 0.8 %        |
| <b>Impairment of ability to brush teeth or comb hair</b> |            |              |
| None                                                     | 51.5%      | 93.3%        |
| Extra effort but no rest periods needed                  | 29.6%      | 3.7%         |
| Rest periods needed                                      | 18.0%      | 2.4%         |
| Cannot do one of these functions                         | 1.0 %      | 0.6 %        |
| <b>Impairment of ability to rise from a chair</b>        |            |              |
| None                                                     | 45.4%      | 82.4%        |
| Mild, sometimes uses arms                                | 33.4%      | 11.8%        |
| Moderate, always use arms                                | 20.1%      | 4.9%         |
| Severe, requires assistance                              | 1.1 %      | 0.9 %        |
| <b>Double vision</b>                                     |            |              |
| None                                                     | 39.6%      | 89.7%        |
| Occurs, but not daily                                    | 30.6%      | 7.3%         |
| Daily, but not constant                                  | 20.1%      | 2.1%         |
| Constant                                                 | 9.8 %      | 0.9 %        |

| <b>Eyelid droop</b>     |       |       |
|-------------------------|-------|-------|
| None                    | 37.7% | 91.2% |
| Occurs, but not daily   | 33.7% | 5.1%  |
| Daily, but not constant | 20.1% | 2.0%  |
| Constant                | 8.5%  | 1.6%  |

MG-ADL permission to use: Mapi Research Trust, Lyon, France, <https://eprovide.mapi-trust.org>

**Table S3. Distribution of respondents from MRW vs POPUP across the 8 HUI 3 domains<sup>a</sup>**

|                                                                                                                                                                                                                            | <b>MRW</b> | <b>POPUP</b> |
|----------------------------------------------------------------------------------------------------------------------------------------------------------------------------------------------------------------------------|------------|--------------|
| <b>Seeing</b>                                                                                                                                                                                                              |            |              |
| Able to see well enough to read ordinary newsprint and recognize a friend on the other side of the street, without glasses or contact lenses.                                                                              | 18.9%      | 34.4%        |
| Able to see well enough to read ordinary newsprint and recognize a friend on the other side of the street, but with glasses.                                                                                               | 61.7%      | 60.7%        |
| Able to read ordinary newsprint with or without glasses but unable to recognize a friend on the other side of the street, even with glasses.                                                                               | 3.7%       | 1.5%         |
| Able to recognize a friend on the other side of the street with or without glasses but unable to read ordinary newsprint, even with glasses.                                                                               | 8.0%       | 1.6%         |
| Unable to read ordinary newsprint and unable to recognize a friend on the other side of the street, even with glasses.                                                                                                     | 7.2%       | 1.2%         |
| Unable to see at all.                                                                                                                                                                                                      | 0.6%       | 0.7%         |
| <b>Hearing</b>                                                                                                                                                                                                             |            |              |
| Able to hear what is said in a group conversation with at least three other people, without a hearing aid.                                                                                                                 | 86.5%      | 90.0%        |
| Able to hear what is said in a conversation with one other person in a quiet room without a hearing aid, but requires a hearing aid to hear what is said in a group conversation with at least three other people.         | 0.4%       | 1.4%         |
| Able to hear what is said in a conversation with one other person in a quiet room with a hearing aid and able to hear what is said in a group conversation with at least three other people with a hearing aid.            | 3.0%       | 3.8%         |
| Able to hear what is said in a conversation with one other person in a quiet room without a hearing aid, but unable to hear what is said in a group conversation with at least three other people even with a hearing aid. | 4.8%       | 1.8%         |
| Able to hear what is said in a conversation with one other person in a quiet room with a hearing aid, but unable to hear what is said in a group conversation with at least three other people even with a hearing aid.    | 0.2%       | 0.8%         |
| Unable to hear at all.                                                                                                                                                                                                     | 5.2%       | 2.2%         |
| <b>Speech</b>                                                                                                                                                                                                              |            |              |
| Able to be understood completely when speaking with strangers or friends.                                                                                                                                                  | 77.0%      | 91.8%        |
| Able to be understood partially when speaking with strangers but able to be understood completely when speaking with people who know me well.                                                                              | 6.7%       | 2.9%         |
| Able to be understood partially when speaking with strangers or people who know me well.                                                                                                                                   | 13.9%      | 3.5%         |
| Unable to be understood when speaking with strangers but able to be understood partially by people who know me well.                                                                                                       | 1.3%       | 0.7%         |
| Unable to be understood when speaking to other people (or unable to speak at all).                                                                                                                                         | 1.1%       | 1.0%         |
| <b>Ambulation</b>                                                                                                                                                                                                          |            |              |
| Able to walk around the neighborhood without difficulty, and without walking equipment.                                                                                                                                    | 48%        | 83%          |
| Able to walk around the neighborhood with difficulty, but does not require walking equipment or the help of another person.                                                                                                | 30.9%      | 10.9%        |

|                                                                                                                                                                            |       |       |
|----------------------------------------------------------------------------------------------------------------------------------------------------------------------------|-------|-------|
| Able to walk around the neighborhood with walking equipment, but without the help of another person.                                                                       | 10.4% | 3.5%  |
| Able to walk only short distances with walking equipment, and requires a wheelchair to get around the neighborhood.                                                        | 7.8%  | 1.7%  |
| Unable to walk alone, even with walking equipment. Able to walk short distances with the help of another person, and requires a wheelchair to get around the neighborhood. | 1.3%  | 0.7%  |
| <b>Dexterity</b>                                                                                                                                                           |       |       |
| Full use of two hands and ten fingers.                                                                                                                                     | 55.6% | 88.6% |
| Limitations in the use of hands or fingers, but does not require special tools or help of another person.                                                                  | 31.1% | 6.7%  |
| Limitations in the use of hands or fingers, is independent with use of special tools (does not require the help of another person).                                        | 6.3%  | 2.4%  |
| Limitations in the use of hands or fingers, requires the help of another person for some tasks (not independent even with the use of special tools).                       | 5.9%  | 1.7%  |
| Limitations in the use of hands or fingers, requires the help of another person for most tasks (not independent even with the use of special tools).                       | 0.7%  | 0.4%  |
| Limitations in the use of hands or fingers, requires the help of another person for all tasks (not independent even with the use of special tools).                        | 0.4%  | 0.3%  |
| <b>Emotion</b>                                                                                                                                                             |       |       |
| Happy and interested in life.                                                                                                                                              | 25.0% | 41.2% |
| Somewhat happy.                                                                                                                                                            | 44.1% | 39.1% |
| Somewhat unhappy.                                                                                                                                                          | 21.7% | 14.4% |
| Very unhappy.                                                                                                                                                              | 6.7%  | 3.7%  |
| So unhappy that life is not worthwhile.                                                                                                                                    | 2.6%  | 1.7%  |
| <b>Cognition</b>                                                                                                                                                           |       |       |
| Able to remember most things, think clearly and solve day to day problems.                                                                                                 | 43.2% | 73.2% |
| Able to remember most things, but have a little difficulty when trying to think and solve day to day problems.                                                             | 14.3% | 5.3%  |
| Somewhat forgetful, but able to think clearly and solve day to day problems.                                                                                               | 11.5% | 9.2%  |
| Somewhat forgetful, and have a little difficulty when trying to think or solve day to day problems.                                                                        | 18.9% | 8.3%  |
| Very forgetful, and have great difficulty when trying to think or solve day to day problems.                                                                               | 11.9% | 3.2%  |
| Unable to remember anything at all, and unable to think or solve day to day problems.                                                                                      | 0.4%  | 0.8%  |
| <b>Pain</b>                                                                                                                                                                |       |       |
| Free of pain and discomfort.                                                                                                                                               | 15.2% | 45.0% |
| Mild to moderate pain that prevents no activities.                                                                                                                         | 31.1% | 38.2% |
| Moderate pain that prevents a few activities.                                                                                                                              | 37.0% | 11.1% |
| Moderate to severe pain that prevents some activities.                                                                                                                     | 11.7% | 4.1%  |
| Severe pain that prevents most activities.                                                                                                                                 | 5.0%  | 1.7%  |

HUI 3 attribute levels are reproduced with permission from Table 1 in: Feeny D, Furlong W, Torrance GW, et al. Multiattribute and single-attribute utility functions for the health utilities index mark 3 system. *Med Care*. Feb 2002;40(2):113-28. doi:10.1097/00005650-200202000-00006
